# Supplementary material
Source: publisher figshare collection journal article supplement (https://acs.figshare.com/ndownloader/files/8974759)
Supplement: Supplementary file 1 [file 8974759]

# Supporting Information

## to

### Sulfurization of Dissolved Organic Matter Increases Hg-S-DOM Bioavailability to a Hg-Methylating Bacterium

Andrew M. Graham<sup>a\*</sup>, Keaton Cameron-Burr<sup>a</sup>, Hayley A. Hajic<sup>a</sup>, Connie PS Lee<sup>a</sup>, Deborah Msekela<sup>a</sup>, and Cynthia C. Gilmour<sup>b</sup>

<sup>a</sup>Grinnell College Department of Chemistry, 1116 8<sup>th</sup> Ave, Grinnell, IA USA 50112

<sup>b</sup>Smithsonian Environmental Research Center, 647 Contees Wharf Rd, Edgewater, MD USA 21037

\*Corresponding author, phone: 641-269-9813, email: [grahaman@grinnell.edu](mailto:grahaman@grinnell.edu)

#### Contents:

|                                                                                                                          |    |
|--------------------------------------------------------------------------------------------------------------------------|----|
| Table SI-1 – DOM Recovery by SPE and slope ratio of recovered DOM .....                                                  | 2  |
| Table SI-2 – Quality assurance/control data for Hg/MeHg analyses .....                                                   | 3  |
| Text describing approach to equilibrium speciation modeling .....                                                        | 4  |
| Table SI-3 – Thermodynamic data for equilibrium speciation modeling .....                                                | 5  |
| Table SI-4 – Summary of experimental variables in Hg methylation assays .....                                            | 6  |
| Table SI-5 – Results of equilibrium speciation modeling .....                                                            | 7  |
| Figure SI-1 – Relationship between Hg/DOM thiol ratio and fraction Hg methylated .....                                   | 8  |
| Figure SI-2 – Relationship between neutral Hg species or total dissolved Hg and cell-normalized<br>MeHg production ..... | 9  |
| References for Supporting Information .....                                                                              | 10 |

**Table SI-1.** Recovery and UV-VIS spectral characteristics of sulfurized DOM by solid phase extraction (SPE). Slope ratio ( $S_R$ ) is the ratio of the slope of the natural log transformed spectra in the wavelength range 275-295 nm divided by the slope in the range 350-400 nm.  $S_R$  is strongly correlated with the size and aromaticity of DOM as described in Helms et al. (2008).<sup>1</sup> The reported error on  $S_R$  was determined based on the relative standard errors of the linear fits to the natural log transformed spectra in each wavelength range.

| Sample              | Measured S/C ratio | SPE Recovery (%) | $S_R$ (slope ratio) |
|---------------------|--------------------|------------------|---------------------|
| SRHA (unsulfurized) | 3.42               | 33.3             | 0.67±0.02           |
| SRHA                | 4.12               | 34.6             | 0.67±0.02           |
| SRHA                | 4.73               | 34.8             | 0.68±0.02           |
| SRHA                | 6.12               | 32.8             | 0.66±0.02           |
| SRHA                | 5.83               | 31.6             | 0.70±0.02           |
| IHSS SRHA (no SPE)  | not measured       | not applicable   | 0.65±0.02           |
| SRFA (unsulfurized) | 1.88               | 67.3             | 0.69±0.02           |
| SRFA                | 3.80               | 54.2             | 0.72±0.02           |
| SRFA                | 4.22               | 53.5             | 0.69±0.02           |
| SRFA                | 4.08               | 55.8             | 0.63±0.02           |
| SRFA                | 5.69               | 52.5             | 0.70±0.02           |
| IHSS SRFA (no SPE)  | not measured       | not applicable   | 0.82±0.05           |
| NLFA (unsulfurized) | 3.12               | 46.2             | 0.78±0.06           |
| NLFA                | 3.98               | 46.6             | 0.76±0.06           |
| NLFA                | 8.83               | 29.4             | 0.74±0.09           |
| NLFA                | 12.8               | 44.9             | 0.84±0.05           |
| IHSS NLFA (no SPE)  | not measured       | not applicable   | 0.65±0.04           |
| PLFA (unsulfurized) | 11.0               | 78.6             | 0.99±0.08           |
| PLFA                | 10.4               | 75.6             | 0.79±0.06           |
| PLFA                | 14.5               | 75.0             | 0.76±0.05           |
| PLFA                | 12.5               | 79.9             | 0.85±0.06           |
| PLFA                | 12.2               | 81.3             | 0.96±0.09           |
| IHSS PLFA (no SPE)  | not measured       | not applicable   | 0.91±0.06           |

**Table SI-2.** Quality control data for total Hg (THg) and methylmercury (MeHg) analyses. Instrument detection limit determined as three times standard deviation of blank.

| <i>Parameter</i>                                        | <i>Result</i>                             |
|---------------------------------------------------------|-------------------------------------------|
| Me <sup>201</sup> Hg instrument detection limit         | 0.11±0.18 pg (0.02 ng/L for 5 mL sample)  |
| Distillation blanks for Me <sup>201</sup> Hg            | 0.02±0.02 ng/L                            |
| Relative percent difference for duplicate MeHg analyses | 7.4±6.2% ( <i>n</i> = 5 pairs)            |
| MeHg recovery for NIST 1566b (oyster tissue)            | 139±8% ( <i>n</i> = 6 determinations)     |
|                                                         |                                           |
| <sup>201</sup> THg instrument detection limit           | 0.37±0.38 ng/L                            |
| Digestion blanks for <sup>201</sup> Hg                  | 0.02±0.04 ng/L                            |
| Relative percent difference for duplicate THg analyses  | 5.4±2.7% ( <i>n</i> = 4 pairs)            |
| THg recovery for NIST 2709a (San Joaquin soil)          | 91.6±22.0% ( <i>n</i> = 8 determinations) |

Instrument detection limit calculated as three times the standard deviation of reagent blanks.

### Description of Equilibrium Speciation Modeling

Equilibrium speciation modeling was performed in MINEQL+ v. 4.6 (Environmental Research Software). Equilibrium constants were critically selected using the most up to date information on  $\text{Hg(II)}_i$  complexation in natural waters. The solubility product for metacinnabar ( $\text{HgS(s)}$ ) was recently reevaluated by Drott *et al.*<sup>2</sup> and reported as  $\log K = 36.8$ , 1.2 log units lower than that reported in the NIST Critical Database.<sup>3</sup> Following Skyllberg,<sup>4</sup> we have assumed that  $\text{Hg(II)}_i$  forms linear two-coordinate complexes with DOM thiols with a  $\log K = 42.0$ . In this approach, we ignore the contribution of weaker O- and N- donor ligands in the DOM pool. This approach is justified for two reasons: 1) DOM/Hg ratios are sufficiently high in these experiments, such that binding will be dominated by stronger S-donor ligands<sup>5</sup>; 2) All solutions contain  $\mu\text{M}$  concentrations of sulfide further diminishing the contributions of weak  $\text{Hg(II)}_i$ -binding ligands.  $[\text{RSH}]_T$  was estimated based upon  $[\text{DOC}]$ , the measured S/C ratio, and the assumption that strong  $\text{Hg(II)}$ -binding thiols could be estimated based on the concentration of exocyclic sulfur in each DOM sample. Manceau and Nagy<sup>6</sup> determined S speciation using X-ray absorption near edge spectroscopy (XANES) for 3 out of the 4 isolates used in this study (and S speciation for the humic acid fraction of the Nordic Lake sample). The percentage of total S as reduced exocyclic S ranged from 23.6 to 46.9% (mean =  $32.2 \pm 10.5\%$ ). We further assume that DOM S speciation is independent of total S content – recent data from Hoffmann *et al.*<sup>7</sup> and Poulin *et al.*<sup>8</sup> suggests, however, that the fraction of total S in reduced forms increases with increasing sulfurization. In that case, our application of a single conversion factor for total S to reduced S may underestimate the true contribution of DOM thiols to  $\text{Hg(II)}_i$  binding. Other input parameters for modeling can be found in Table SI-3 below; for sulfide concentration, the mean of initial and final ( $t=3$  h) concentrations were input into the speciation model. In modeling Hg-cysteine complexation, some reports suggest the possibility of a tris  $\text{Hg(cys)}$  complex (likely  $\text{Hg(Hcys)}_3^-$ ).<sup>9</sup> Unfortunately, no thermodynamic data are available for this purported complex. Kőszegi-Szalai and Paál<sup>10</sup> reported equilibrium constants for Hg-penicillamine complexes, including a  $\text{Hg(Hpen)}_3^-$  complex with a  $\log K$  of 75.3 at  $I = 0$  M. Given their similar structures (differing only in the two  $\text{CH}_3$ —substituents at the 3-position for penicillamine), we can evaluate the potential contributions of a  $\text{Hg(Hcys)}_3^-$  complex to  $\text{Hg(II)}_i$  speciation using the  $\log K$  for the  $\text{Hg(Hpen)}_3^-$  complex. Using this approach, we find that  $\text{Hg(Hcys)}_3^-$  is not likely to be a significant species under our experimental conditions ( $[\text{}^{201}\text{Tg}]$ ,  $[\text{H}_2\text{S}]_T$ ,  $[\text{cys}]_T$ , and pH), and we do not include this species in our modeling. A summary of important thermodynamic data for speciation modeling can be found in Table SI-3 below.

**Table SI-3.** Thermodynamic data for equilibrium speciation modeling. Equilibrium constants for Hg-Cl and Hg-OH complexes were taken directly from the MINEQL+ database.

| <i>Reaction</i>                                                                | <i>log K</i> | <i>Reference</i>                 |
|--------------------------------------------------------------------------------|--------------|----------------------------------|
| <i>Hg-sulfide Aqueous Speciation</i>                                           |              |                                  |
| $\text{Hg}^{2+} + 2\text{HS}^- = \text{Hg}(\text{SH})_2^0$                     | 39.1         | Drott <i>et al.</i> <sup>2</sup> |
| $\text{Hg}^{2+} + 2\text{HS}^- = \text{HgS}_2\text{H}^- + \text{H}^+$          | 32.5         | Drott <i>et al.</i> <sup>2</sup> |
| $\text{Hg}^{2+} + 2\text{HS}^- = \text{HgS}_2^{2-} + 2\text{H}^+$              | 23.2         | Drott <i>et al.</i> <sup>2</sup> |
| <i>Metacinnabar Precipitation</i>                                              |              |                                  |
| $\text{Hg}^{2+} + \text{HS}^- = \text{HgS}(\text{s}) + \text{H}^+$             | 36.8         | Drott <i>et al.</i> <sup>2</sup> |
| <i>Hg-DOM Complexation</i>                                                     |              |                                  |
| $\text{Hg}^{2+} + 2\text{RS}^- = \text{Hg}(\text{SR})_2$                       | 42.0         | Skylberg <sup>4</sup>            |
| $\text{RS}^- + \text{H}^+ = \text{RSH}$                                        | 10.0         | Skylberg <sup>4</sup>            |
| <i>Hg-CYS Complexation</i>                                                     |              |                                  |
| $\text{Hg}^{2+} + 2\text{H}^+ + 2\text{CYS}^{2-} = \text{Hg}(\text{HCYS})_2^0$ | 64.1         | Starý and Kratzer. <sup>11</sup> |
| $\text{Hg}^{2+} + 2\text{CYS}^{2-} = \text{Hg}(\text{CYS})_2^{2-}$             | 43.9         | Starý and Kratzer. <sup>11</sup> |

**Table SI-4.** Summary of experimental variables in Hg methylation assays with *Desulfovibrio desulfuricans* ND132 in the presences of sulfurized DOM samples. DOM isolates were sulfurized as described in the main text, resulting in the S/C ratios reported in the table below. Reported values are means and standard deviations ( $n = 3$ , excepting NLFA experiments, where  $n = 2$ ). n.d. = not determined due to lost samples. Cell density is average cell density measured at beginning and end of 3h incubation which typically increased less than 5% over the duration of the experiment.

| DOM Isolate or Control                | [DOC]<br>(mg/L) | Measured<br>S/C ratio<br>(mmol<br>S/mol C) | Cell density<br>( $\times 10^8$<br>cells/mL) | pH              | Initial<br>sulfide<br>( $\mu$ M) | Final<br>sulfide<br>( $\mu$ M) | Total $^{201}\text{Hg}$<br>in medium<br>(nM) | Total<br>filterable<br>$^{201}\text{Hg}$ (nM) | Total<br>Me $^{201}\text{Hg}$ in<br>medium<br>(pM) |
|---------------------------------------|-----------------|--------------------------------------------|----------------------------------------------|-----------------|----------------------------------|--------------------------------|----------------------------------------------|-----------------------------------------------|----------------------------------------------------|
| SRHA                                  | 9.19            | 3.42                                       | 5.68 $\pm$ 0.21                              | 7.27 $\pm$ 0.01 | 2.25 $\pm$ 0.05                  | 3.62 $\pm$ 0.12                | 0.30 $\pm$ 0.16                              | 0.21 $\pm$ 0.01                               | 39.6 $\pm$ 4.9                                     |
| SRHA                                  | 9.52            | 4.12                                       | 5.57 $\pm$ 0.22                              | 7.31 $\pm$ 0.01 | 2.67 $\pm$ 0.26                  | 3.92 $\pm$ 0.02                | 0.30 $\pm$ 0.05                              | 0.29 $\pm$ 0.04                               | 66.4 $\pm$ 1.3                                     |
| SRHA                                  | 9.58            | 4.73                                       | 5.32 $\pm$ 0.31                              | 7.25 $\pm$ 0.01 | 3.36 $\pm$ 0.08                  | 4.15 $\pm$ 0.11                | 0.32 $\pm$ 0.06                              | 0.26 $\pm$ 0.04                               | 80.7 $\pm$ 1.5                                     |
| SRHA                                  | 9.59            | 6.12                                       | 5.67 $\pm$ 0.19                              | 7.20 $\pm$ 0.01 | 4.18 $\pm$ 0.24                  | 4.40 $\pm$ 0.06                | 0.31 $\pm$ 0.01                              | 0.23 $\pm$ 0.004                              | 95.8 $\pm$ 1.2                                     |
| SRHA                                  | 9.24            | 5.83                                       | 5.43 $\pm$ 0.09                              | 7.33 $\pm$ 0.02 | 3.72 $\pm$ 0.17                  | 4.53 $\pm$ 0.10                | 0.39 $\pm$ 0.02                              | 0.24 $\pm$ 0.01                               | 128.4 $\pm$ 1.9                                    |
| SRFA                                  | 10              | 1.88                                       | 4.55 $\pm$ 0.82                              | 7.28 $\pm$ 0.04 | 2.33 $\pm$ 0.10                  | 3.01 $\pm$ 0.29                | 0.057 $\pm$ 0.003                            | 0.028 $\pm$ 0.004                             | 24.0 $\pm$ 0.6                                     |
| SRFA                                  | 10              | 3.80                                       | 5.75 $\pm$ 1.51                              | 7.28 $\pm$ 0.04 | 2.79 $\pm$ 0.29                  | 3.22 $\pm$ 0.20                | 0.070 $\pm$ 0.008                            | 0.034 $\pm$ 0.007                             | 40.5 $\pm$ 1.6                                     |
| SRFA                                  | 10              | 4.22                                       | 5.15 $\pm$ 0.38                              | 7.29 $\pm$ 0.02 | 2.88 $\pm$ 0.10                  | 3.36 $\pm$ 0.06                | 0.083 $\pm$ 0.007                            | 0.054 $\pm$ 0.014                             | 52.5 $\pm$ 2.9                                     |
| SRFA                                  | 10              | 4.08                                       | 5.03 $\pm$ 0.52                              | 7.22 $\pm$ 0.02 | 2.87 $\pm$ 0.03                  | 3.44 $\pm$ 0.14                | 0.13 $\pm$ 0.01                              | 0.088 $\pm$ 0.007                             | 86.6 $\pm$ 0.2                                     |
| SRFA                                  | 10              | 5.69                                       | 4.74 $\pm$ 0.26                              | 7.26 $\pm$ 0.02 | 3.58 $\pm$ 0.25                  | 3.76 $\pm$ 0.20                | 0.26 $\pm$ 0.001                             | 0.12 $\pm$ 0.02                               | 160 $\pm$ 8                                        |
| NLFA                                  | 10              | 3.12                                       | 1.44 $\pm$ 0.21                              | 7.52 $\pm$ 0.12 | 0.26 $\pm$ 0.18                  | 0.95 $\pm$ 0.83                | 0.15 $\pm$ 0.07                              | 0.067 $\pm$ 0.006                             | 36.9 $\pm$ 11.4                                    |
| NLFA                                  | 10              | 3.98                                       | 1.50 $\pm$ 0.15                              | 7.74 $\pm$ 0.05 | 0.10 $\pm$ 0.04                  | 0.33 $\pm$ 0.06                | 0.099 $\pm$ 0.003                            | 0.086 $\pm$ 0.006                             | 53.4 $\pm$ 13.6                                    |
| NLFA                                  | 10              | 8.83                                       | 1.36 $\pm$ 0.18                              | 7.61 $\pm$ 0.10 | 0.05 $\pm$ 0.01                  | 0.42 $\pm$ 0.31                | 0.10 $\pm$ 0.01                              | 0.090 $\pm$ 0.01                              | 49.5 $\pm$ 13.4                                    |
| NLFA                                  | 10              | 12.8                                       | 1.66 $\pm$ 0.07                              | 7.66 $\pm$ 0.04 | 0.30 $\pm$ 0.06                  | 0.42 $\pm$ 0.11                | 0.15 $\pm$ 0.01                              | 0.17 $\pm$ 0.01                               | 138 $\pm$ 9                                        |
| PLFA                                  | 8.3             | 11.0                                       | 4.79 $\pm$ 0.23                              | 7.35 $\pm$ 0.02 | 3.99 $\pm$ 0.27                  | 6.44 $\pm$ 0.78                | 0.13 $\pm$ 0.004                             | 0.018 $\pm$ 0.002                             | 39.2 $\pm$ 4.0                                     |
| PLFA                                  | 8.3             | 10.4                                       | 5.11 $\pm$ 0.45                              | 7.35 $\pm$ 0.05 | 5.13 $\pm$ 0.52                  | 6.87 $\pm$ 0.47                | 0.13 $\pm$ 0.003                             | 0.036 $\pm$ 0.006                             | 64.2 $\pm$ 6.3                                     |
| PLFA                                  | 8.3             | 14.5                                       | 4.76 $\pm$ 0.33                              | 7.34 $\pm$ 0.05 | 5.13 $\pm$ 0.52                  | 7.02 $\pm$ 0.28                | 0.12 $\pm$ 0.01                              | 0.038 $\pm$ 0.002                             | 53.0 $\pm$ 7.0                                     |
| PLFA                                  | 8.3             | 12.5                                       | 5.28 $\pm$ 0.37                              | 7.28 $\pm$ 0.06 | 4.78 $\pm$ 0.19                  | 6.72 $\pm$ 0.54                | 0.11 $\pm$ 0.01                              | 0.030 $\pm$ 0.008                             | 62.1 $\pm$ 10.7                                    |
| PLFA                                  | 8.3             | 12.2                                       | 5.80 $\pm$ 0.89                              | 7.32 $\pm$ 0.02 | 5.13 $\pm$ 0.52                  | 6.56 $\pm$ 0.26                | 0.11 $\pm$ 0.01                              | 0.049 $\pm$ 0.008                             | 57.8 $\pm$ 0.8                                     |
| 500 $\mu$ M L-cysteine control (SRHA) | N/A             | N/A                                        | 5.74 $\pm$ 0.13                              | 7.28 $\pm$ 0.00 | 5.78 $\pm$ 0.11                  | 19.3 $\pm$ 0.1                 | 0.46 $\pm$ 0.02                              | 0.07 $\pm$ 0.01                               | 362 $\pm$ 6                                        |
| 500 $\mu$ M L-cysteine control (SRFA) | N/A             | N/A                                        | 4.04 $\pm$ 0.67                              | 7.14 $\pm$ 0.00 | 5.55 $\pm$ 0.72                  | 31.1 $\pm$ 4.9                 | 0.37 $\pm$ 0.02                              | 0.28 $\pm$ 0.02                               | 308 $\pm$ 11                                       |
| 500 $\mu$ M L-cysteine control (NLFA) | N/A             | N/A                                        | 1.43 $\pm$ 0.17                              | 7.30 $\pm$ 0.06 | 0.28 $\pm$ 0.10                  | 4.08 $\pm$ 3.1                 | 0.13 $\pm$ 0.02                              | n.d.                                          | 43.4 $\pm$ 13.4                                    |
| 500 $\mu$ M L-cysteine control (PLFA) | N/A             | N/A                                        | 5.15 $\pm$ 0.45                              | 7.23 $\pm$ 0.04 | 5.90 $\pm$ 0.88                  | 17.0 $\pm$ 0.7                 | 0.31 $\pm$ 0.07                              | 0.39 $\pm$ 0.01                               | 347 $\pm$ 20                                       |
| No DOM control (SRHA)                 | N/A             | N/A                                        | 5.31 $\pm$ 0.34                              | 7.40 $\pm$ 0.01 | 3.64 $\pm$ 0.13                  | 2.75 $\pm$ 0.1                 | 0.28 $\pm$ 0.02                              | 0.25 $\pm$ 0.01                               | 2.2 $\pm$ 0.2                                      |
| No DOM control (SRFA)                 | N/A             | N/A                                        | 3.81 $\pm$ 0.10                              | 7.20 $\pm$ 0.12 | 2.74 $\pm$ 0.25                  | 3.22 $\pm$ 0.53                | 0.064 $\pm$ 0.007                            | 0.007 $\pm$ 0.005                             | 6.5 $\pm$ 1.2                                      |

**Table SI-5.** Predicted equilibrium speciation of inorganic Hg(II) based on measured total  $^{201}\text{Hg}$  in medium, pH, sulfide, DOC, and S/C ratio of DOM.  $\text{Hg}(\text{SR})_2$  is a two-coordinate complex of  $\text{Hg}(\text{II})_i$  with organic thiols;  $\text{Hg}(\text{SH})_2$  is the equivalent complex with inorganic sulfide.

| DOM Isolate or Control                      | $[\text{RSH}]_T$<br>( $\mu\text{M}$ ) | [Meta-cinnabar] (M)    | $[\text{Hg}(\text{SR})_2]$ (M) | $[\text{Hg}(\text{SH})_2]$<br>(M) | $[\text{HgS}_2\text{H}^-] + [\text{HgS}_2^{2-}]$ (M) | Total dissolved Hg (M) |
|---------------------------------------------|---------------------------------------|------------------------|--------------------------------|-----------------------------------|------------------------------------------------------|------------------------|
| SRHA                                        | 0.62                                  | $1.77 \times 10^{-10}$ | $7.28 \times 10^{-15}$         | $1.65 \times 10^{-11}$            | $1.06 \times 10^{-10}$                               | $1.23 \times 10^{-10}$ |
| SRHA                                        | 0.77                                  | $1.60 \times 10^{-10}$ | $1.08 \times 10^{-14}$         | $1.74 \times 10^{-11}$            | $1.23 \times 10^{-10}$                               | $1.40 \times 10^{-10}$ |
| SRHA                                        | 0.89                                  | $1.65 \times 10^{-10}$ | $1.15 \times 10^{-14}$         | $2.18 \times 10^{-11}$            | $1.33 \times 10^{-10}$                               | $1.55 \times 10^{-10}$ |
| SRHA                                        | 1.15                                  | $1.36 \times 10^{-10}$ | $1.55 \times 10^{-14}$         | $2.69 \times 10^{-11}$            | $1.47 \times 10^{-10}$                               | $1.74 \times 10^{-10}$ |
| SRHA                                        | 1.06                                  | $2.14 \times 10^{-10}$ | $1.69 \times 10^{-14}$         | $2.10 \times 10^{-11}$            | $1.55 \times 10^{-10}$                               | $1.76 \times 10^{-10}$ |
| SRFA                                        | 0.40                                  | undersaturated         | $1.70 \times 10^{-15}$         | $7.50 \times 10^{-12}$            | $4.94 \times 10^{-11}$                               | $5.69 \times 10^{-11}$ |
| SRFA                                        | 0.80                                  | undersaturated         | $6.44 \times 10^{-15}$         | $9.24 \times 10^{-12}$            | $6.09 \times 10^{-11}$                               | $7.01 \times 10^{-11}$ |
| SRFA                                        | 0.88                                  | undersaturated         | $9.12 \times 10^{-15}$         | $1.07 \times 10^{-11}$            | $7.18 \times 10^{-11}$                               | $8.25 \times 10^{-11}$ |
| SRFA                                        | 0.85                                  | undersaturated         | $1.19 \times 10^{-14}$         | $1.90 \times 10^{-11}$            | $1.09 \times 10^{-10}$                               | $1.28 \times 10^{-10}$ |
| SRFA                                        | 1.19                                  | $1.02 \times 10^{-10}$ | $2.13 \times 10^{-14}$         | $2.10 \times 10^{-11}$            | $1.32 \times 10^{-10}$                               | $1.53 \times 10^{-10}$ |
| NLFA                                        | 0.84                                  | $1.21 \times 10^{-10}$ | $1.00 \times 10^{-13}$         | $2.18 \times 10^{-12}$            | $2.54 \times 10^{-11}$                               | $2.77 \times 10^{-11}$ |
| NLFA                                        | 1.06                                  | $8.73 \times 10^{-11}$ | $6.80 \times 10^{-13}$         | $5.20 \times 10^{-13}$            | $1.03 \times 10^{-11}$                               | $1.15 \times 10^{-11}$ |
| NLFA                                        | 2.36                                  | $9.30 \times 10^{-11}$ | $3.00 \times 10^{-12}$         | $5.81 \times 10^{-13}$            | $8.42 \times 10^{-12}$                               | $1.20 \times 10^{-11}$ |
| NLFA                                        | 3.42                                  | $1.32 \times 10^{-10}$ | $3.77 \times 10^{-12}$         | $9.70 \times 10^{-13}$            | $1.59 \times 10^{-11}$                               | $2.06 \times 10^{-11}$ |
| PLFA                                        | 3.55                                  | undersaturated         | $9.18 \times 10^{-14}$         | $1.53 \times 10^{-11}$            | $1.19 \times 10^{-10}$                               | $1.34 \times 10^{-10}$ |
| PLFA                                        | 3.39                                  | undersaturated         | $6.34 \times 10^{-14}$         | $1.53 \times 10^{-11}$            | $1.19 \times 10^{-10}$                               | $1.35 \times 10^{-10}$ |
| PLFA                                        | 4.70                                  | undersaturated         | $1.08 \times 10^{-13}$         | $1.44 \times 10^{-11}$            | $1.09 \times 10^{-10}$                               | $1.24 \times 10^{-10}$ |
| PLFA                                        | 5.75                                  | undersaturated         | $7.14 \times 10^{-14}$         | $1.38 \times 10^{-11}$            | $9.11 \times 10^{-11}$                               | $1.05 \times 10^{-10}$ |
| PLFA                                        | 5.85                                  | undersaturated         | $7.21 \times 10^{-14}$         | $1.35 \times 10^{-11}$            | $9.74 \times 10^{-11}$                               | $1.11 \times 10^{-10}$ |
| 500 $\mu\text{M}$ L-cysteine control (SRHA) | 500                                   | undersaturated         | $4.60 \times 10^{-10}$         | $2.43 \times 10^{-19}$            | $1.68 \times 10^{-14}$                               | $4.60 \times 10^{-10}$ |
| 500 $\mu\text{M}$ L-cysteine control (SRFA) | 500                                   | undersaturated         | $1.27 \times 10^{-10}$         | $7.12 \times 10^{-17}$            | $9.94 \times 10^{-15}$                               | $1.27 \times 10^{-10}$ |
| 500 $\mu\text{M}$ L-cysteine control (NLFA) | 500                                   | undersaturated         | $3.09 \times 10^{-10}$         | $6.09 \times 10^{-17}$            | $3.56 \times 10^{-16}$                               | $3.09 \times 10^{-10}$ |
| 500 $\mu\text{M}$ L-cysteine control (PLFA) | 500                                   | undersaturated         | $3.71 \times 10^{-10}$         | $2.59 \times 10^{-15}$            | $1.23 \times 10^{-14}$                               | $3.71 \times 10^{-10}$ |
| No DOM control (SRHA)                       | 0                                     | $1.33 \times 10^{-10}$ | 0                              | $1.44 \times 10^{-11}$            | $1.26 \times 10^{-10}$                               | $1.40 \times 10^{-10}$ |
| No DOM control (SRFA)                       | 0                                     | undersaturated         | 0                              | $9.91 \times 10^{-12}$            | $5.41 \times 10^{-11}$                               | $6.40 \times 10^{-11}$ |

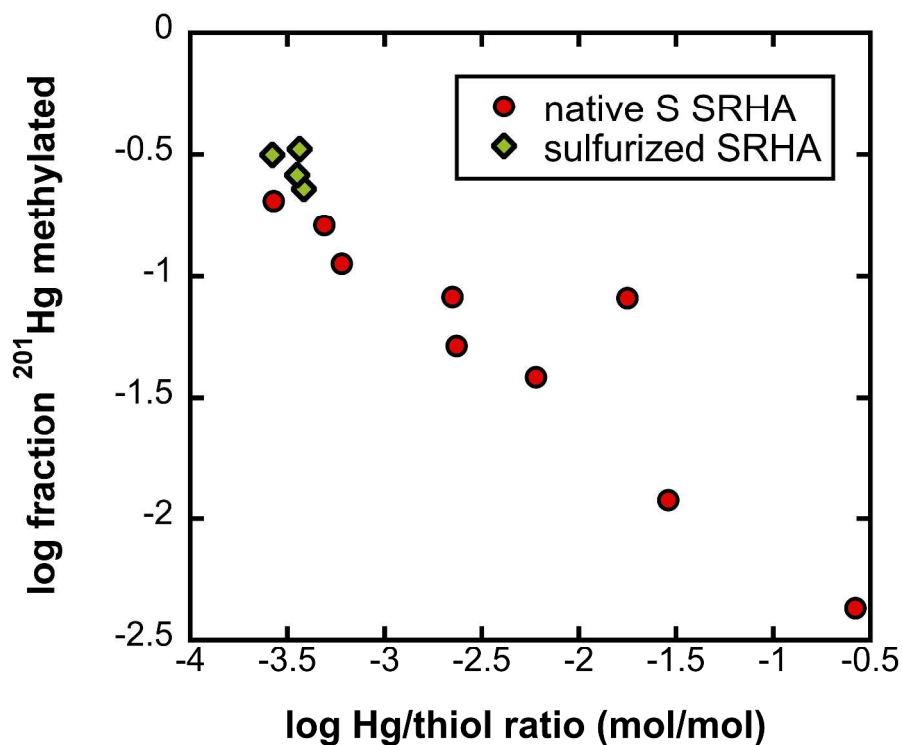

**Figure SI-1.** Relationship between log Hg/thiol ratio and log fraction <sup>201</sup>Hg methylated in solutions containing Suwannee River humic acid (SRHA), sulfide, and <sup>201</sup>HgCl<sub>2</sub>. Data for native SRHA include data from this study and from Graham et al.<sup>12</sup> Data for sulfurized SRHA from this study only. Thiol concentrations were estimated based on measured S/C ratio for SRHA samples and the assumption that 70% of total DOM S was thiols.



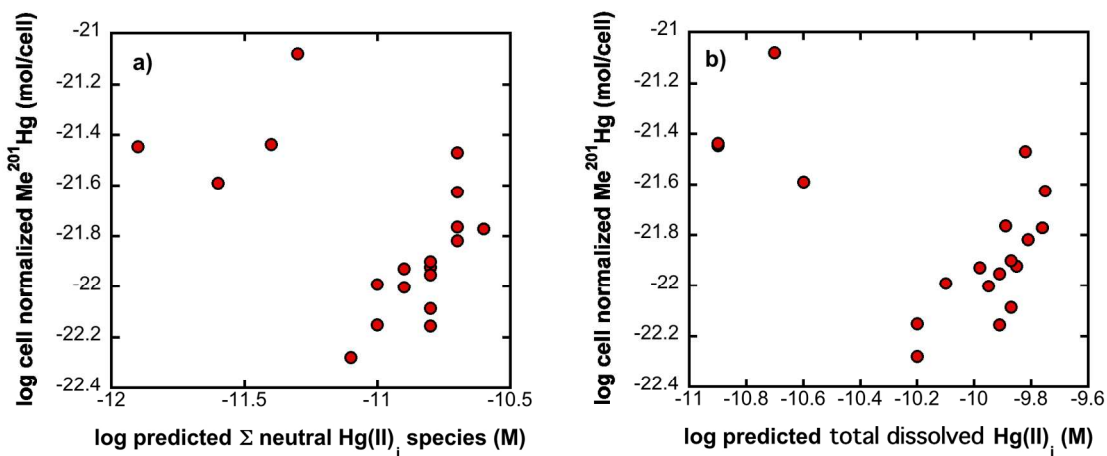

**Figure SI-2.** Correlations between the sum of neutral Hg(II)<sub>i</sub> species (**panel a**) or total dissolved Hg(II)<sub>i</sub> (**panel b**) and cell-normalized MeHg production. MeHg production cell-normalized due to significant differences in cell density between experiments. Data log-transformed due to non-normal distributions.

## References for Supporting Information

1. Helms, J. R. *et al.* Absorption spectral slopes and slope ratios as indicators of molecular weight, source, and photobleaching of chromophoric dissolved organic matter. *Limnol Oceanogr* **53**, 955–969 (2008).
2. Drott, A., Björn, E., Bouchet, S. & Skjellberg, U. Refining thermodynamic constants for mercury(II)-sulfides in equilibrium with metacinnabar at sub-micromolar aqueous sulfide concentrations. *Environ Sci Technol* **47**, 4197–4203 (2013).
3. National Institute of Standards and Technology. NIST Critically Selected Stability Constants of Metal Complexes.
4. Skjellberg, U. Competition among thiols and inorganic sulfides and polysulfides for Hg and MeHg in wetland soils and sediments under suboxic conditions: Illumination of controversies and implications for MeHg net production. *J Geophys Res-Bioge* **113**, G00C03 (2008).
5. Haitzer, M., Aiken, G. & Ryan, J. Binding of mercury(II) to dissolved organic matter: The role of the mercury-to-DOM concentration ratio. *Environ Sci Technol* **36**, 3564–3570 (2002).
6. Manceau, A. & Nagy, K. L. Quantitative analysis of sulfur functional groups in natural organic matter by XANES spectroscopy. *Geochim Cosmochim Acta* **99**, 206–223 (2012).
7. Hoffmann, M., Mikutta, C. & Kretzschmar, R. Bisulfide reaction with natural organic matter enhances arsenite sorption: Insights from X-ray absorption spectroscopy. *Environ Sci Technol* **46**, 11788–11797 (2012).
8. Poulin, B. A. *et al.* Spatial dependence of reduced sulfur in Everglades dissolved organic matter controlled by sulfate enrichment. *Environ Sci Technol* **51**, 3630–3639 (2017).
9. Schaefer, J. K. & Morel, F. M. M. High methylation rates of mercury bound to cysteine by *Geobacter sulfurreducens*. *Nature Geoscience* **2**, 123–126 (2009).
10. Koszegi-Szalai, H. & Paal, T. L. Equilibrium studies of mercury (II) complexes with penicillamine. *Talanta* **48**, 393–402 (1999).
11. Stary, J. & Kratzer, K. Radiometric determination of stability-constants of mercury species complexes with L-cysteine. *J Radioan Nucl Ch Le* **126**, 69–75 (1988).
12. Graham, A. M., Aiken, G. R. & Gilmour, C. C. Dissolved organic matter enhances microbial mercury methylation under sulfidic conditions. *Environ Sci Technol* **46**, 2715–2723 (2012).
